# Supplementary material
Source: PubMed Central journal article supplement (PMC3842619)

# Supplementary Figure 1

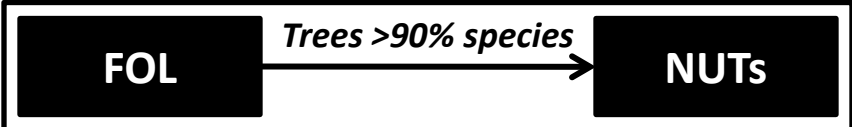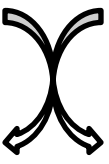

- Boot split distance (BSD)
- Inconsistency Score (IS)
- Classical multidimensional scaling analysis( CMDS)
- Map of quartet species
- The Tree-Net Trend (TNT)

- Forest of life (FOL)
- Nearly universal trees (NUTs)
- Central trend tree of life (TOL)
- Patterns in the FOL
- Tree and net components of evolution

Supplementary Figure 2

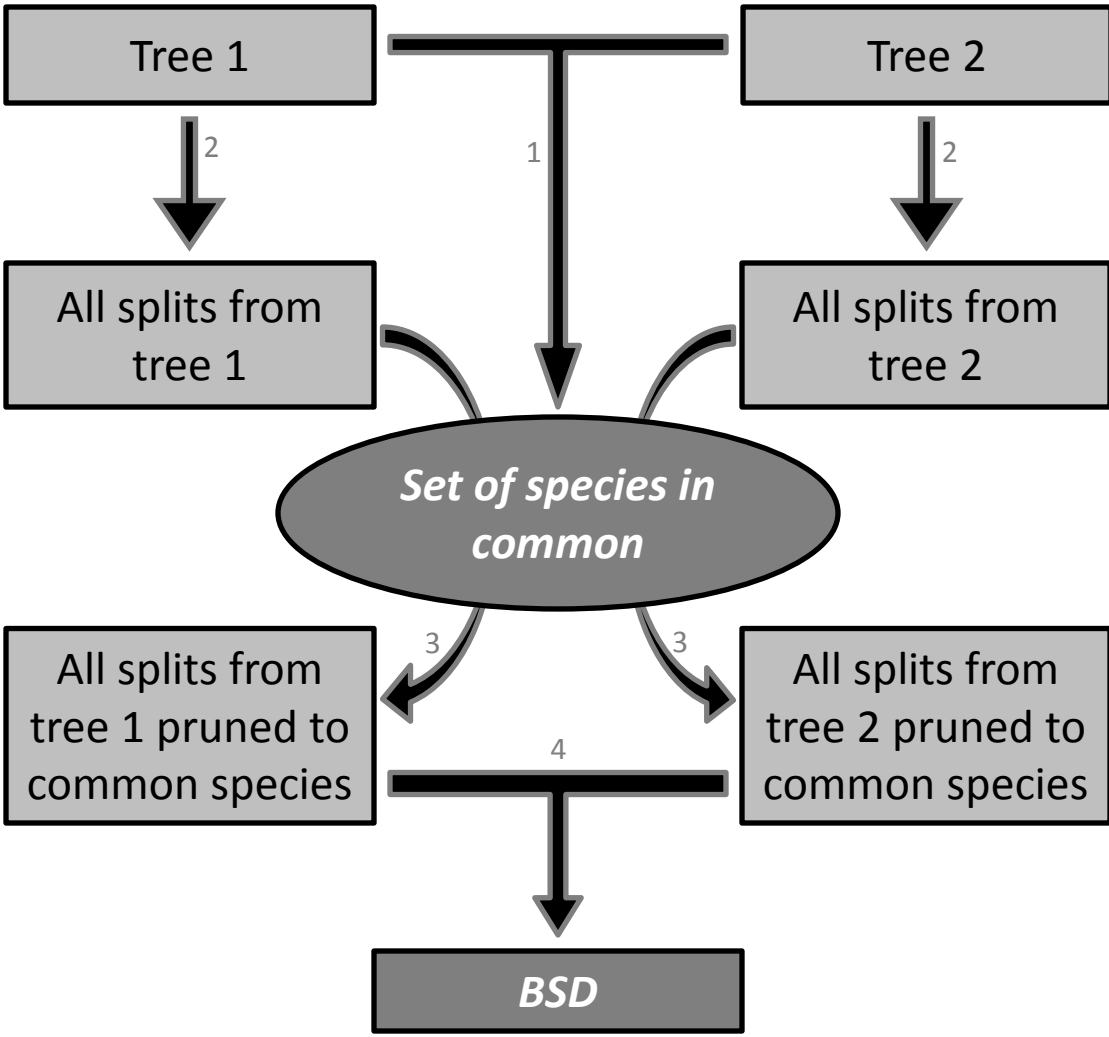

# Supplementary Figure 3

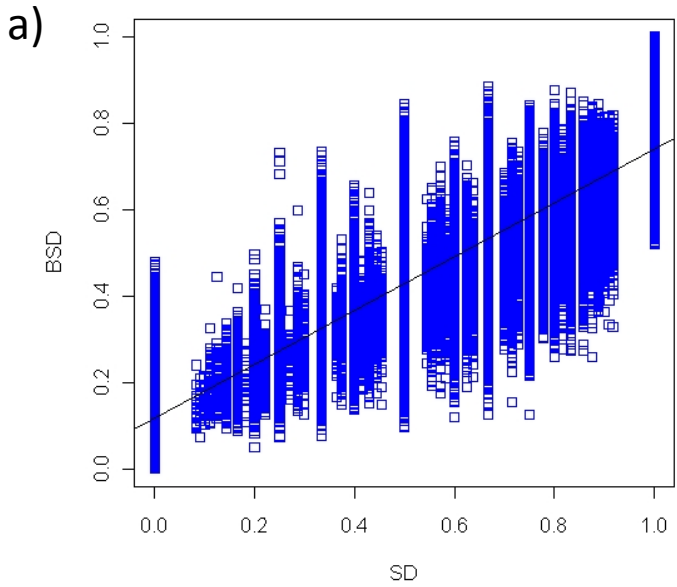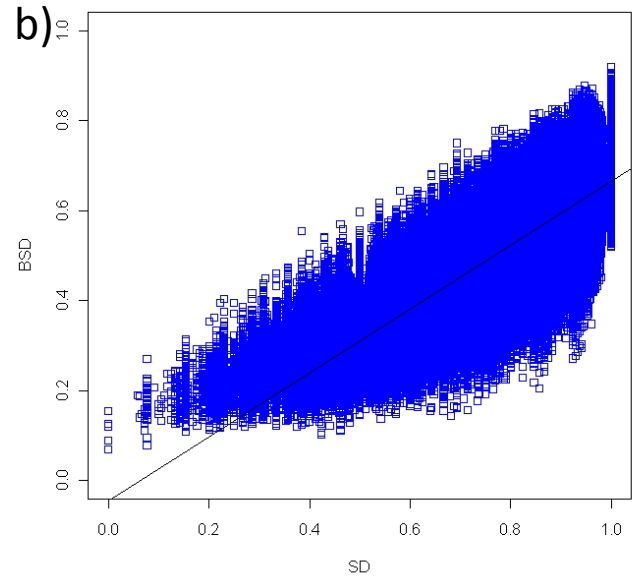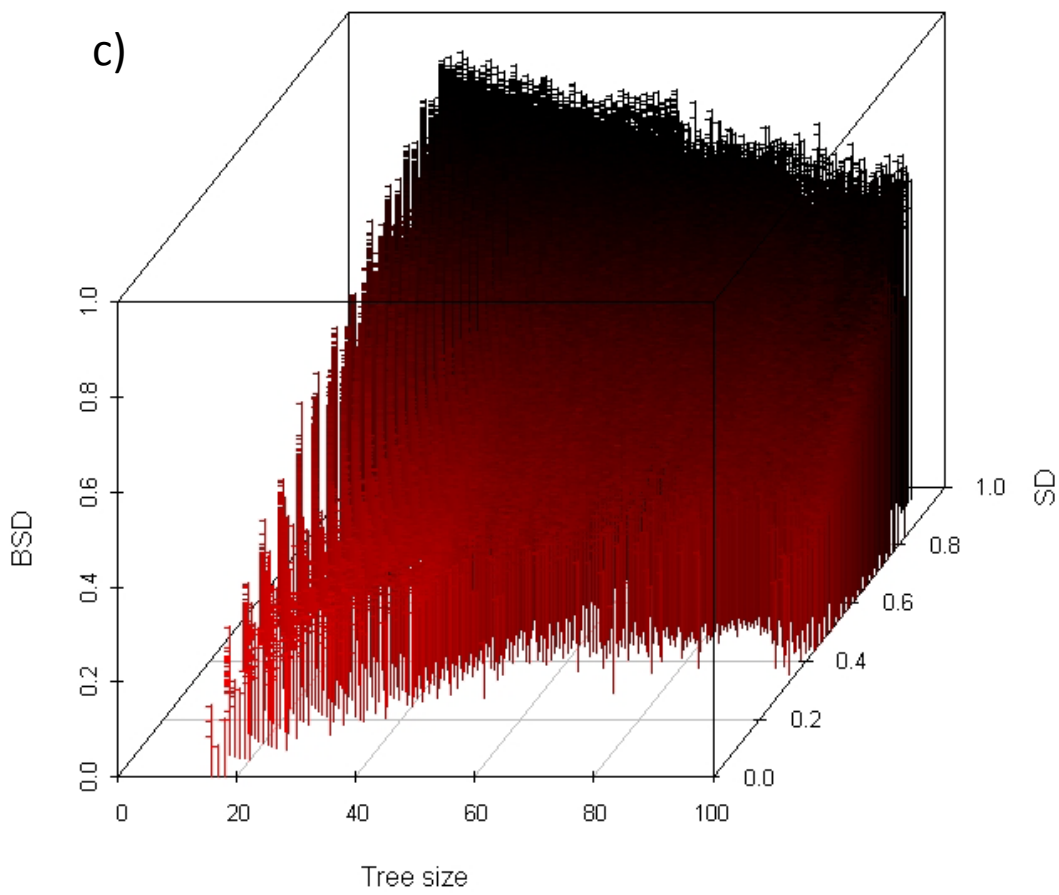

# Supplementary Figure 4

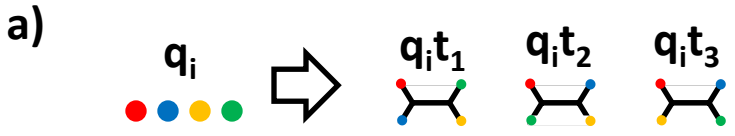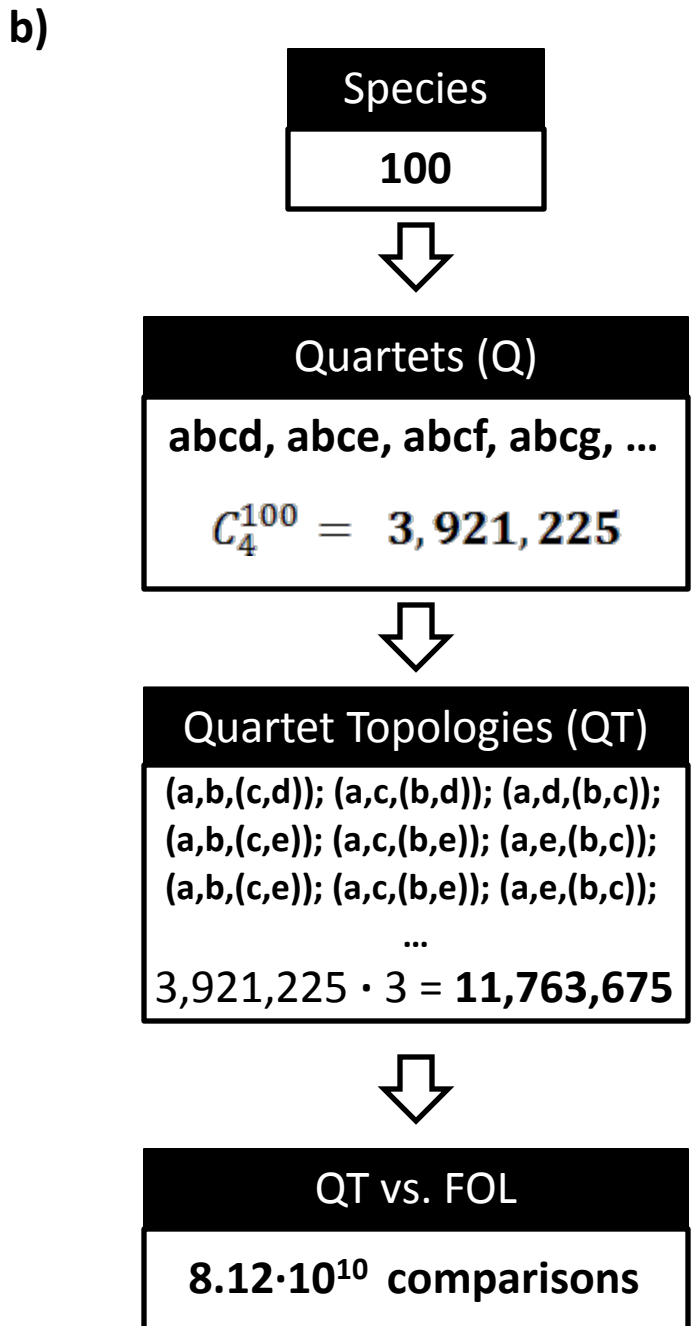

# Supplementary Figure 5

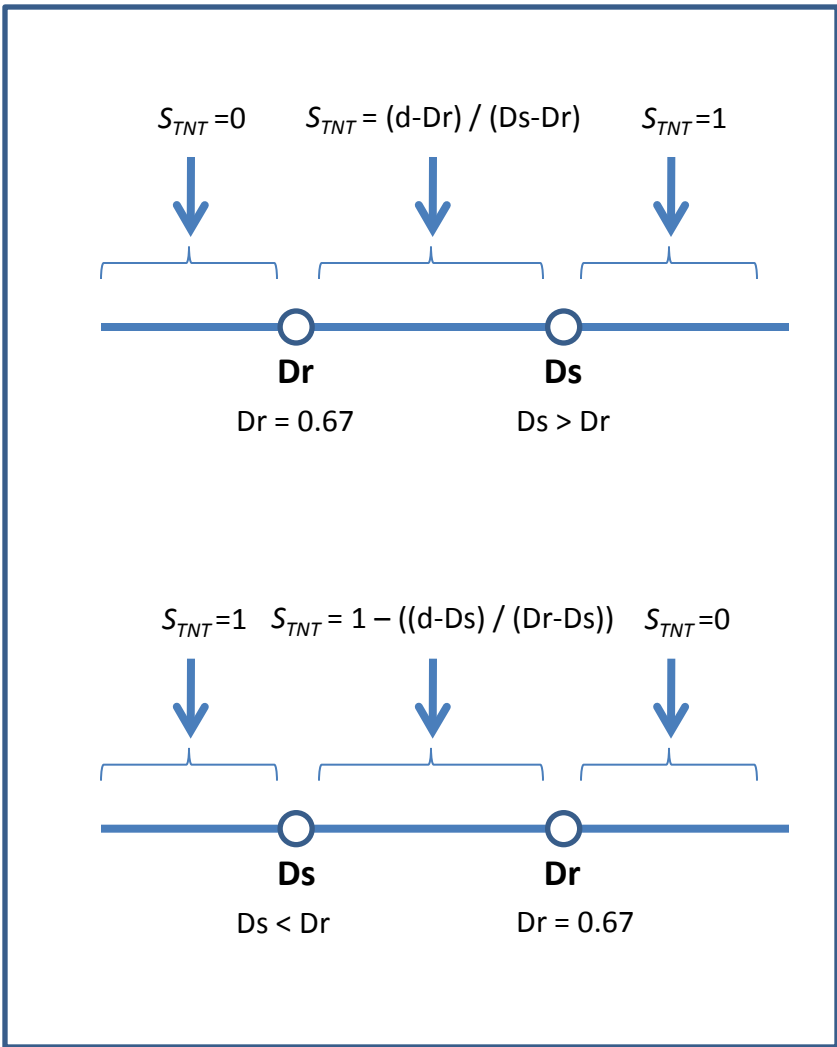

Supplement: NIHMS519038-supplement-Figures_S1-S5.pdf [file NIHMS519038-supplement-Figures_S1-S5.pdf]
